# Supplementary material
Source: HighWire-hosted journal article supplement (https://jnm.snmjournals.org/highwire/filestream/95034/field_highwire_adjunct_files/0/181826_Supplemental_Data.pdf)
Supplement: 181826_Supplemental_Data.pdf [file 181826_Supplemental_Data.pdf]

**Supplemental Table 1. Features derived from PET images**

| <b>Type</b>                                     | <b>Features</b>                        |
|-------------------------------------------------|----------------------------------------|
| <b>5 Conventional SUV measures</b>              | Metabolic Tumor Volume (MTV)           |
|                                                 | SUVmax                                 |
|                                                 | SUVmean                                |
|                                                 | SUVpeak                                |
|                                                 | SUVtotal (or Total glycolysis lesion)  |
| <b>7 Shape</b>                                  | Maximum Diameter (Dmax)                |
|                                                 | Surface Area (SA)                      |
|                                                 | Surface to Volume Ratio (SVR)          |
|                                                 | Sphericity                             |
|                                                 | Spherical Disproportion                |
|                                                 | Compactness x 2                        |
| <b>13 Histogram (Hist)</b>                      | Minimum                                |
|                                                 | Range                                  |
|                                                 | Standard Deviation (STD)               |
|                                                 | Variance                               |
|                                                 | Median                                 |
|                                                 | Skewness                               |
|                                                 | Kurtosis                               |
|                                                 | Entropy                                |
|                                                 | Uniformity                             |
|                                                 | Energy                                 |
|                                                 | Root Mean Square (RMS)                 |
|                                                 | Total Energy                           |
|                                                 | Mean Absolute Deviation (MAD)          |
| <b>22 Gray Level Cooccurrence Matrix (GLCM)</b> | Autocorrelation                        |
|                                                 | Contrast                               |
|                                                 | Correlation                            |
|                                                 | Cluster Prominence                     |
|                                                 | Cluster Shade                          |
|                                                 | Dissimilarity                          |
|                                                 | Energy                                 |
|                                                 | Entropy                                |
|                                                 | Homogeneity x 2                        |
|                                                 | Maximum Probability                    |
|                                                 | Sum of Square                          |
|                                                 | Sum Average                            |
|                                                 | Sum Variance                           |
|                                                 | Sum Entropy                            |
|                                                 | Difference Entropy                     |
|                                                 | Information Measure of Correlation x 2 |
|                                                 | Normalized Inverse Difference          |
|                                                 | Normalized Inverse Difference Moment   |
|                                                 | Inverse Variance                       |
|                                                 | Cluster Tendency                       |
| <b>11 Gray Level Run Length Matrix (GLRLM)</b>  | Short Run Emphasis                     |
|                                                 | Long Run Emphasis                      |
|                                                 | Gray Level Nonuniformity               |

|                                                                                                                                                                                                                                    |                               |
|------------------------------------------------------------------------------------------------------------------------------------------------------------------------------------------------------------------------------------|-------------------------------|
|                                                                                                                                                                                                                                    | Run Length Nonuniformity      |
|                                                                                                                                                                                                                                    | Run Percentage                |
|                                                                                                                                                                                                                                    | Low Gray Level Run Emphasis   |
|                                                                                                                                                                                                                                    | High Gray Level Run Emphasis  |
|                                                                                                                                                                                                                                    | Short Run Low Gray Emphasis   |
|                                                                                                                                                                                                                                    | Short Run High Gray Emphasis  |
|                                                                                                                                                                                                                                    | Long Run Low Gray Emphasis    |
|                                                                                                                                                                                                                                    | Long Run High Gray Emphasis   |
|                                                                                                                                                                                                                                    |                               |
| <b>10 Gray Level Size Zone Matrix (GLSZM)</b>                                                                                                                                                                                      | Small Zone Emphasis           |
|                                                                                                                                                                                                                                    | Large Zone Emphasis           |
|                                                                                                                                                                                                                                    | Size Zone Variability         |
|                                                                                                                                                                                                                                    | Zone Percentage               |
|                                                                                                                                                                                                                                    | Low Gray Zone Emphasis        |
|                                                                                                                                                                                                                                    | High Gray Zone Emphasis       |
|                                                                                                                                                                                                                                    | Low Gray Small Zone Emphasis  |
|                                                                                                                                                                                                                                    | High Gray Small Zone Emphasis |
|                                                                                                                                                                                                                                    | Low Gray Large Zone Emphasis  |
|                                                                                                                                                                                                                                    | High Gray Large Zone Emphasis |
|                                                                                                                                                                                                                                    |                               |
| <b>5 Neighborhood Gray Tone Difference Matrix (NGTDM)</b>                                                                                                                                                                          | Coarseness                    |
|                                                                                                                                                                                                                                    | Contrast                      |
|                                                                                                                                                                                                                                    | Busyness                      |
|                                                                                                                                                                                                                                    | Complexity                    |
|                                                                                                                                                                                                                                    | Strength                      |
| <b>Supplemental Table 1.</b> Five commonly used imaging measures and sixty-eight radiomic features. Gray=image gray level intensity. Compactness and Information Measure of Correlation were computed using two different methods. |                               |



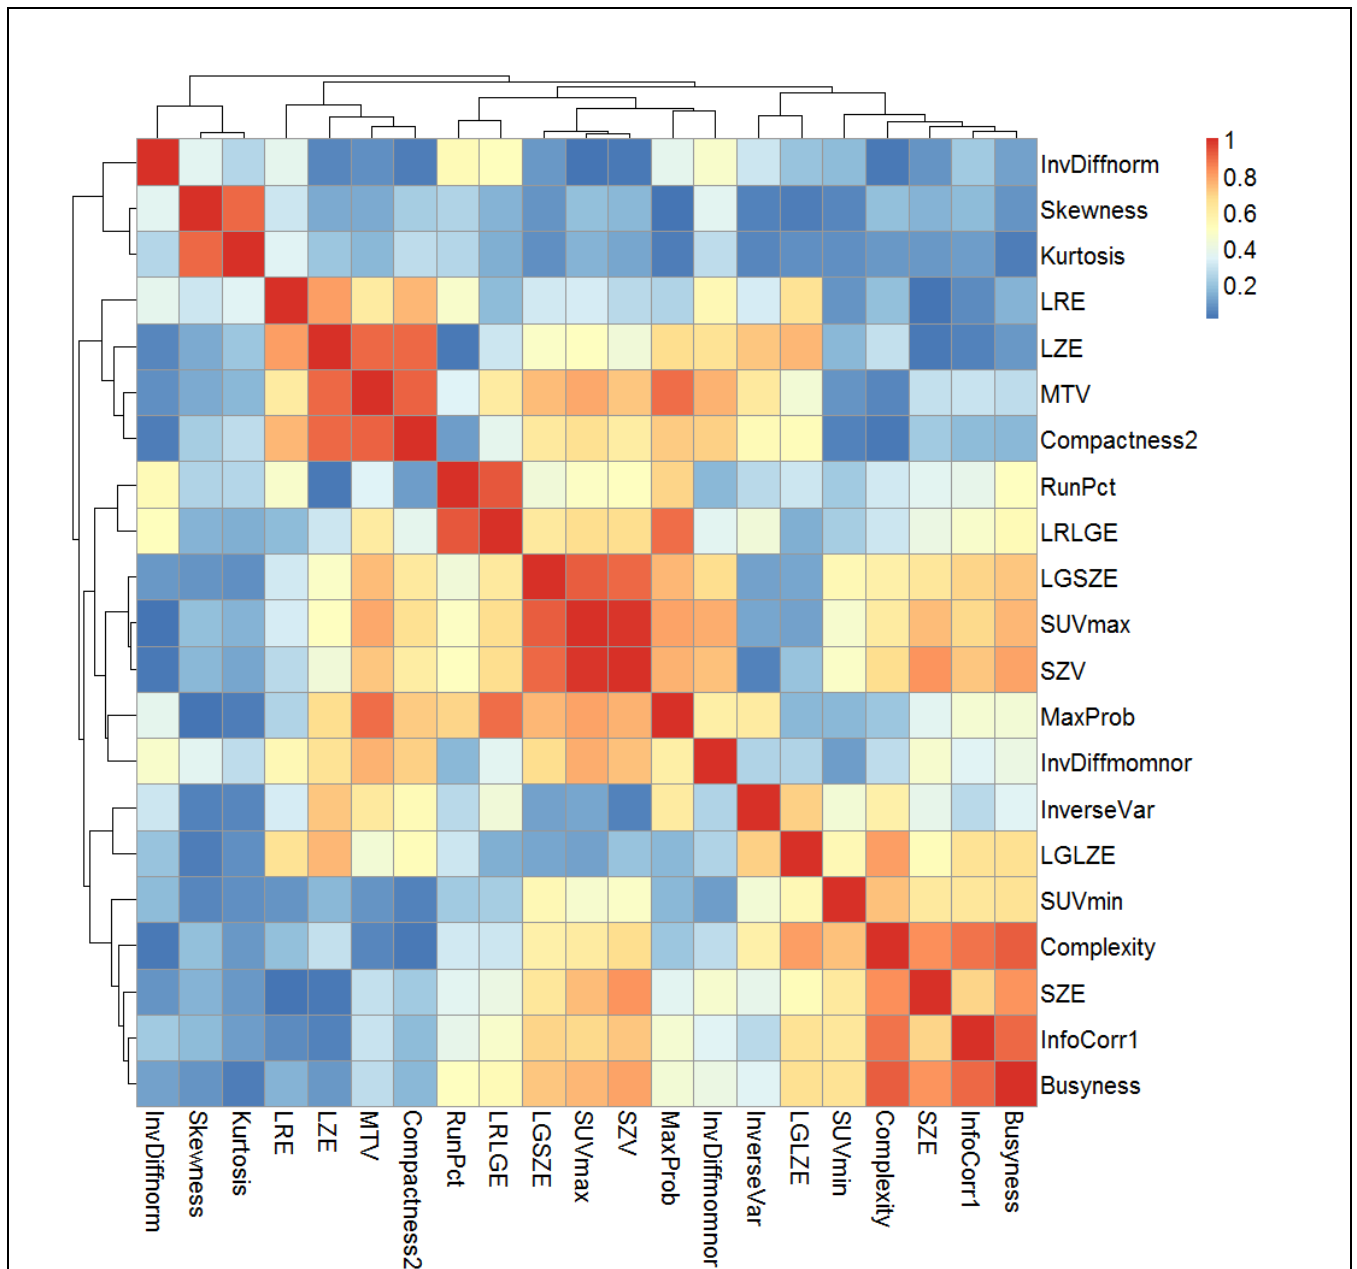

Supplemental Figure 2. Spearman's correlation coefficient between 21 PET features. Conventional features=Metabolic tumor volume (MTV) and  $SUV_{max}$ . Shape-based feature = Compactness, Histogram-based features =  $SUV_{min}$ , Skewness, Kurtosis, Maximum Probability (MaxProb). GLCM-based features=Information Measure of Correlation (InfoCorr), Normalized Inverse Difference (InvDiffnorm), Normalized Inverse Difference Moment (InvDiffmomnor), Inverse Variance (InverseVar). RLM-based features=Long Run Emphasis (LRE), Run Percentage (Run Percentage), Long Run Low Gray Emphasis (LRLGE). SZM-based features= Small Zone Emphasis (SZE), Large Zone Emphasis (LZE), Size Zone Variability (SZV), Low Gray Small Zone Emphasis (LGSZE), Low Gray Large Zone Emphasis (LGLZE). NGTDM-based features =Busyness and Complexity.

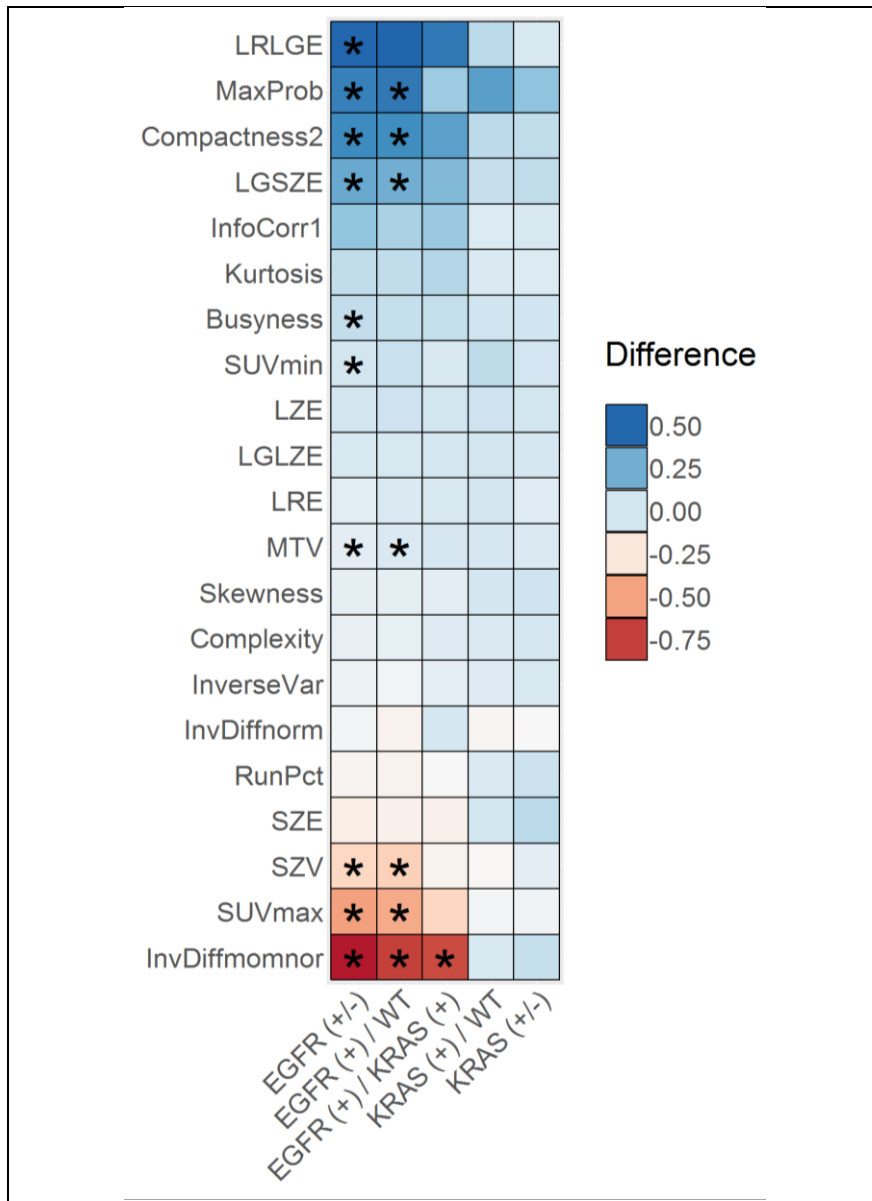

Supplemental Figure 3. Comparison of PET features between mutation statuses. The Wilcoxon rank-sum test was used to determine if there was a significant difference in the PET features.  $FDR_{Wilcoxon} < 0.10$  is indicated by \*. The values of all PET features were normalized using a z-transformation. Entries in the column of EGFR+ vs EGFR-, EGFR+ vs KRAS+, and KRAS+ vs KRAS- represent the difference of the median values of the transformed measures. For example, in column EGFR+ vs EGFR-, the entry values <0 indicates that the median value of the PET feature for EGFR+ is lower than EGFR-.

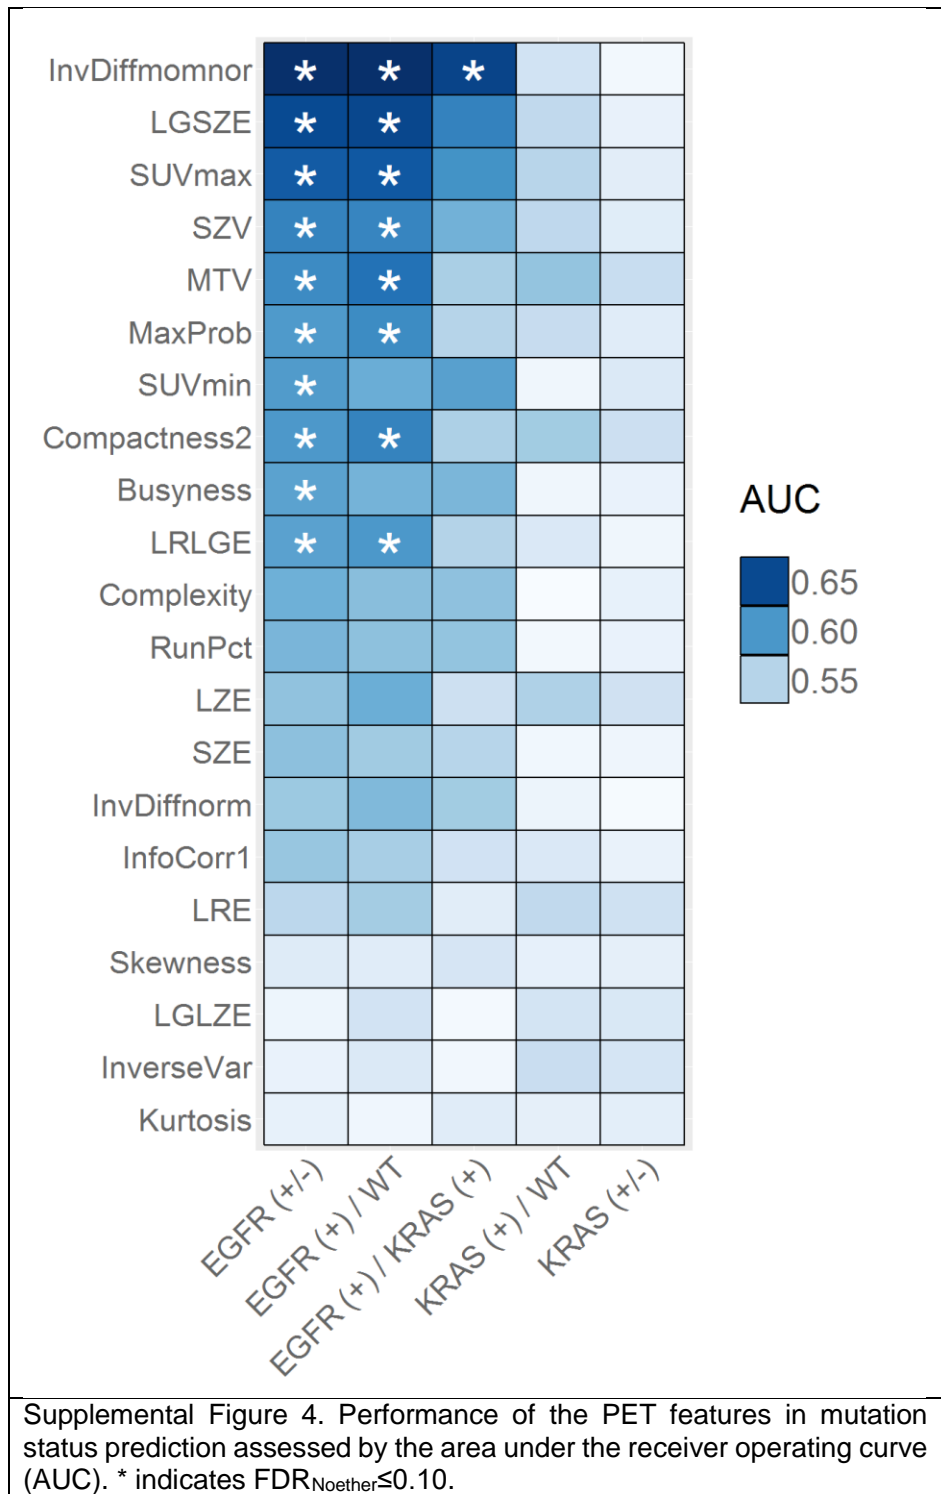

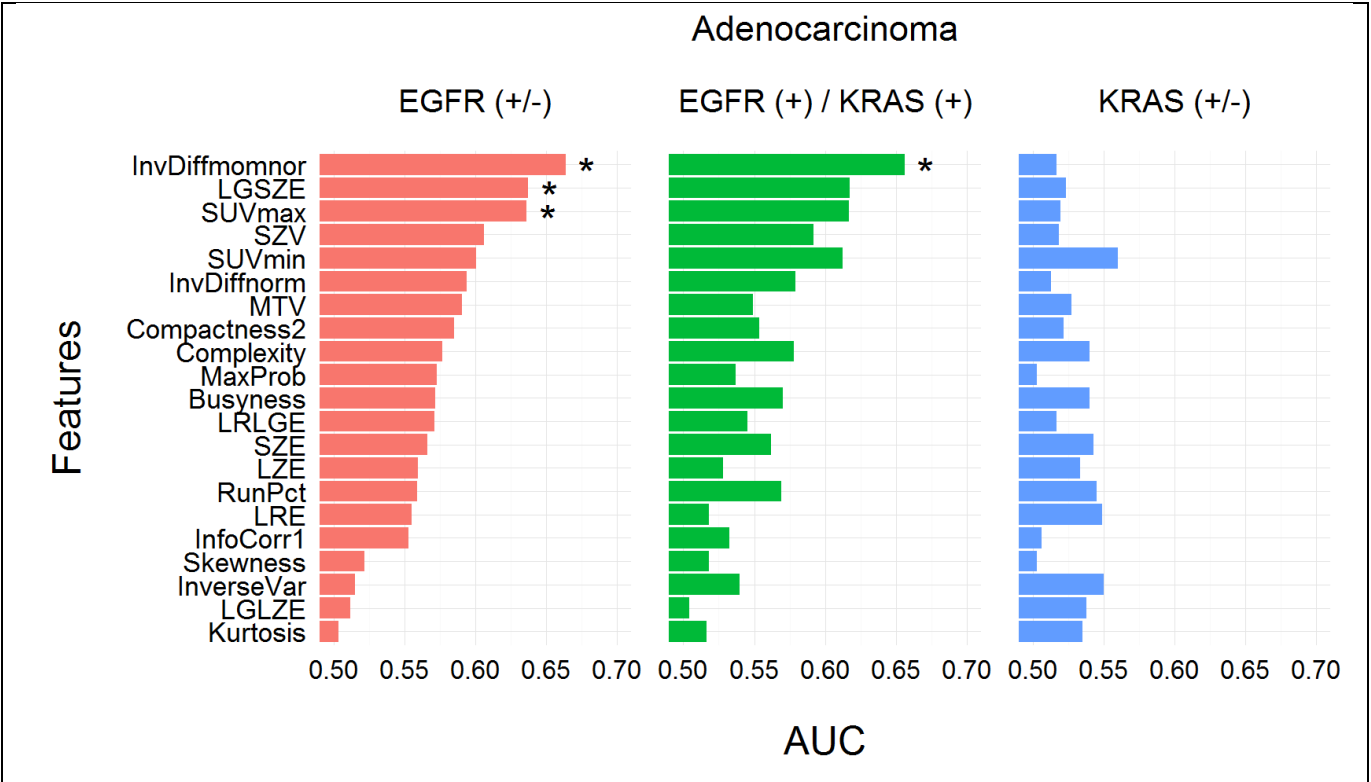

Supplemental Figure 5. Area under the ROC curve (AUC) for patients with adenocarcinoma histology. \* indicates that the AUC is significantly greater than a random guess (>0.5) assessed with Noether's test (FDR<sub>Noether</sub> ≤ 0.10).
